# Supplementary material for: Ets1 and ESE1 reciprocally regulate expression of ZEB1/ZEB2, dependent on ERK1/2 activity, in breast cancer cells
Source: PubMed Central journal article supplement — Cancer Sci. 2017 May 22;108(5):952–60. doi: 10.1111/cas.13214 (PMC5448599; doi:10.1111/cas.13214), 2017-05-22

**Supplemental figure 1. Repression of ZEB1 and ZEB2 by Ets1 siRNAs. (a and b)**

Forty-eight hours after transfection of MDA-MB-231 cells with control siRNA (siNC) or Ets1 siRNA (#1), the cells were analyzed by immunofluorescence analyses with anti-N-cadherin antibody (green), TOPRO to detect nuclei (white) and phalloidin (red) to detect actin stress-fiber formation (a), and by qRT-PCR analyses (b). Each value represents the mean  $\pm$  s.d. of triplicate determinations from a representative experiment. Similar results were obtained in two independent experiments.

**Supplemental figure 2. Roles of ESE1 and Ets1 in breast cancer cells. (a)** Various reporter

constructs were co-transfected with Flag-tagged Ets1 expression plasmid (Flag-Ets1) or Flag-tagged mutated Ets1 expression plasmid (mut, threonine 38 converted to alanine) in MCF7 cells, and luciferase activities were measured. Expression of transfected Ets1 was confirmed by immunoblot analyses using anti-Flag antibody. **(b)** MDA-MB-231 cells were treated with 10  $\mu$ M U0126, a MEK1/2 inhibitor, for up to 24 hours, followed by immunoblot analyses using the indicated antibodies.  $\alpha$ -tubulin levels were monitored as a loading control. p-Ets1, phospho-Ets1 (threonine 38). **(c)** Forty-eight hours after transfection with expression plasmids encoding

control and ESE1 in MDA-MB-231 cells, levels of the indicated mRNAs were evaluated by qRT-PCR analyses. Each value represents the mean  $\pm$  s.d. of triplicate determinations from a representative experiment. Similar results were obtained in two independent experiments.

**Supplemental figure 3. Silencing of Ets1 sensitizes breast cancer cells to anti-tumor drugs.**

After transfection with control siRNA (NC) and Ets1 siRNAs (#1 and #3), MDA-MB-231 and BT549 cells were exposed to cisplatin or adriamycin at the concentration of 30  $\mu$ M.

Twenty-four hours later, cell viability was evaluated by MTT assay. Each value represents the mean  $\pm$  s.d. of triplicate determinations from a representative experiment. The value of control siRNA (NC) is indicated as “1”. Similar results were obtained in two independent experiments using cells transfected with NC or Ets1 siRNAs.

**Supplemental figure 4. Inhibition of the Ets1-promoted activity by ESE1.** After transfection

with the indicated plasmids into MCF7 cells, luciferase activities were measured. Expression of

transfected Ets1 (Flag-Ets1) and ESE1 (Flag-ESE1) was confirmed by immunoblot analyses using anti-Flag antibody.

# Supplemental Figure 1

**a**

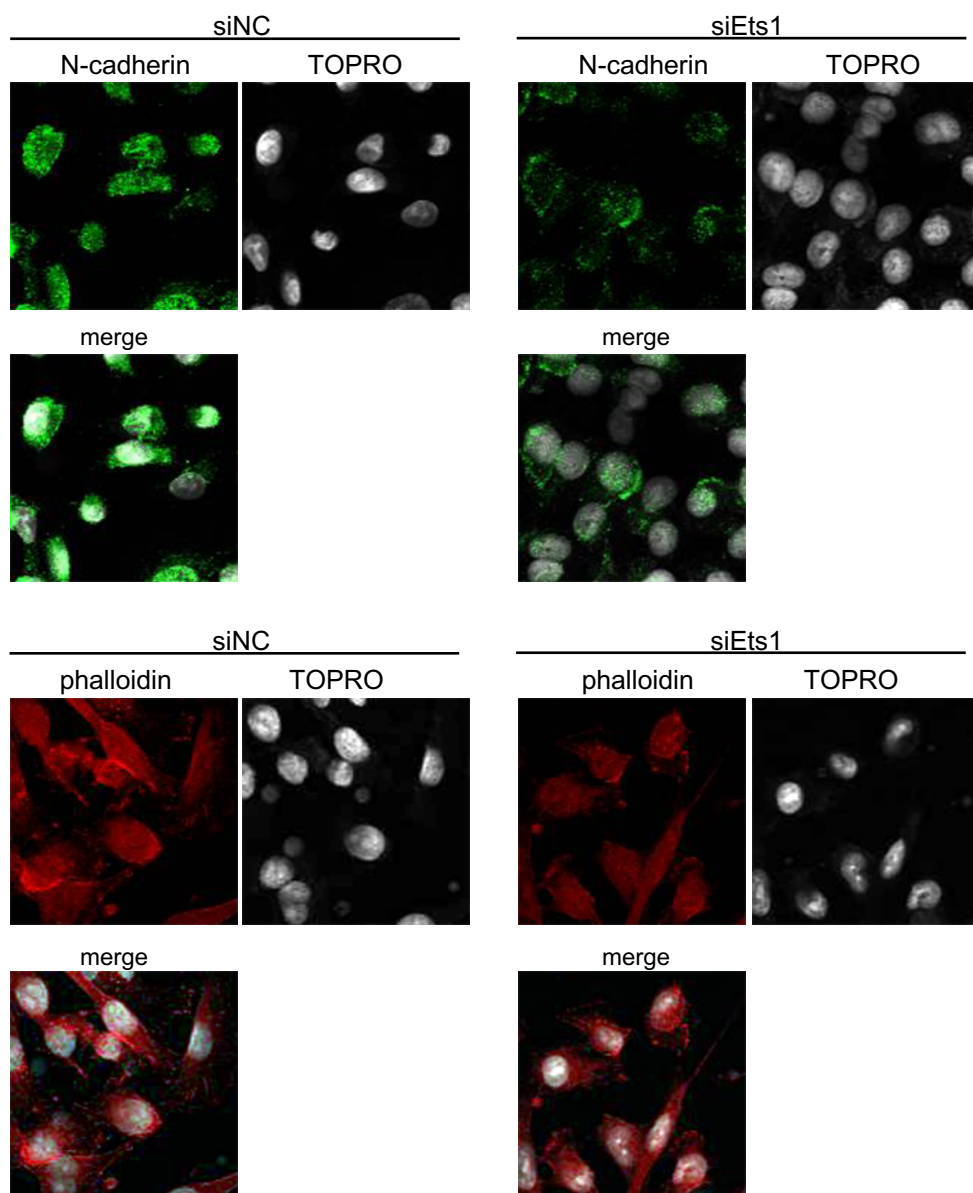

**b**

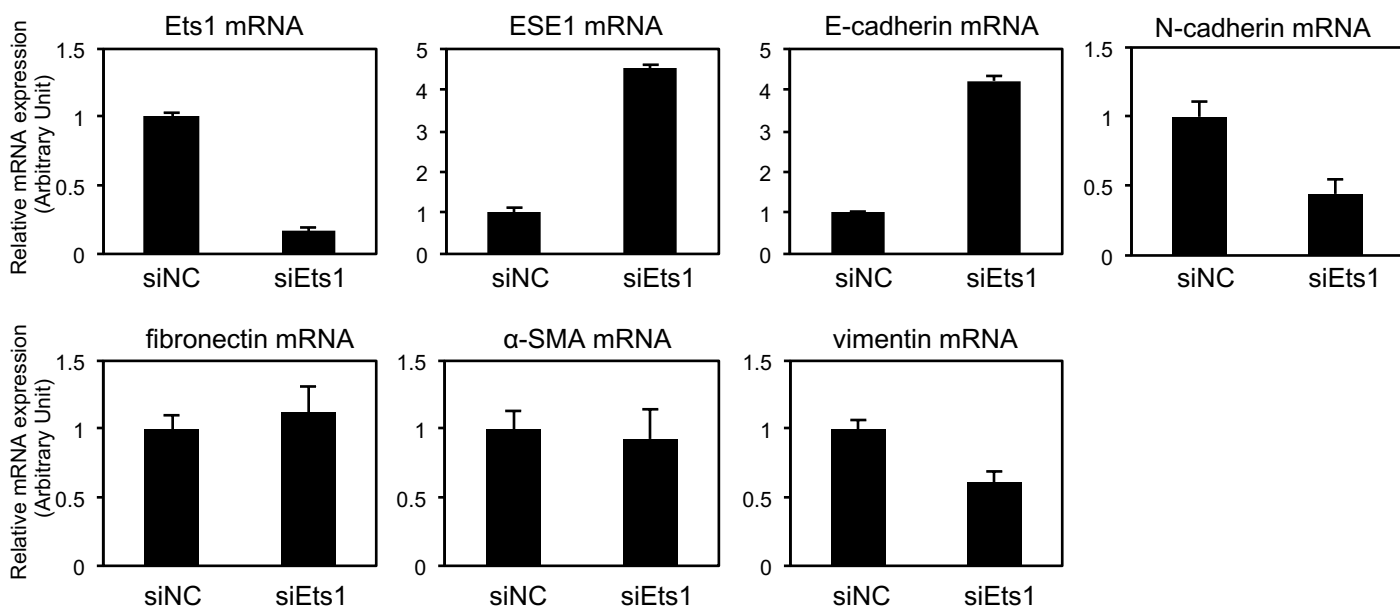

## Supplemental Figure 2

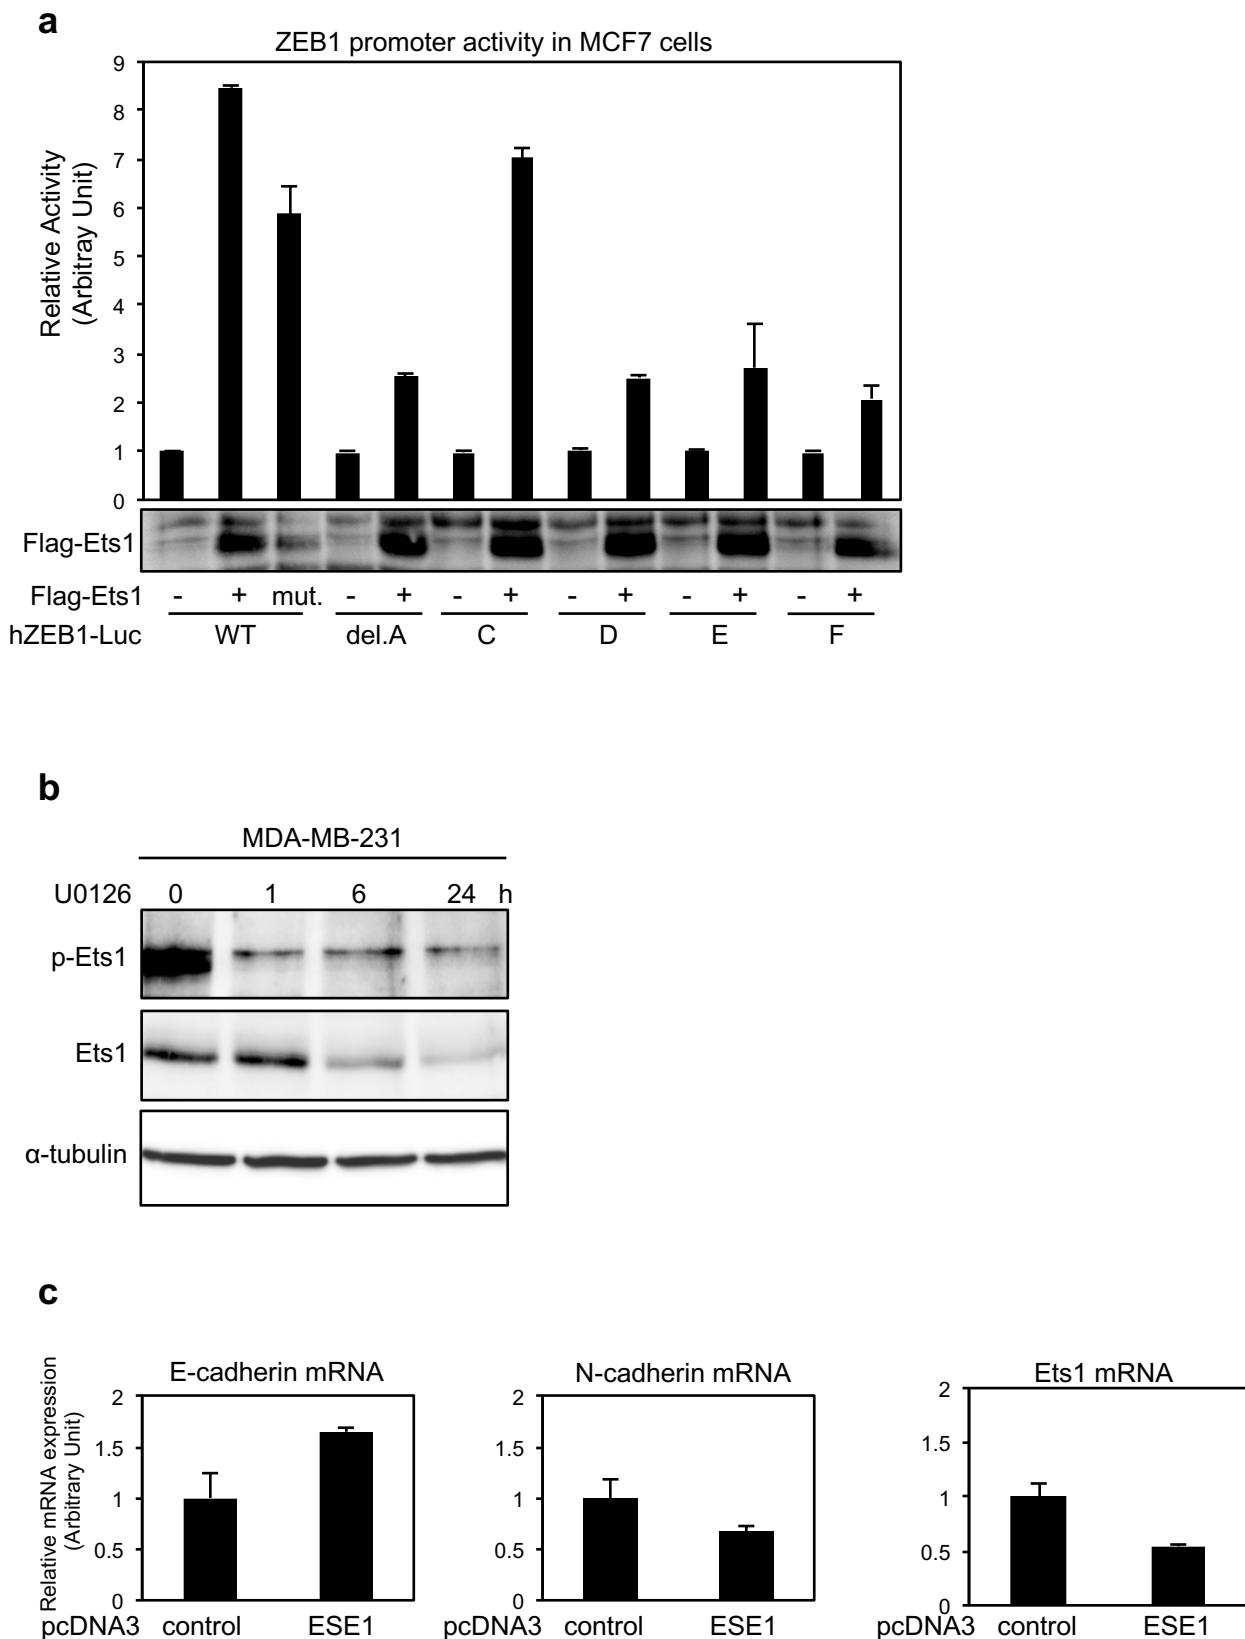

### Supplemental Figure 3

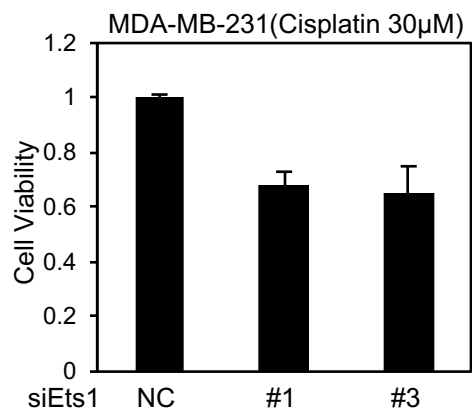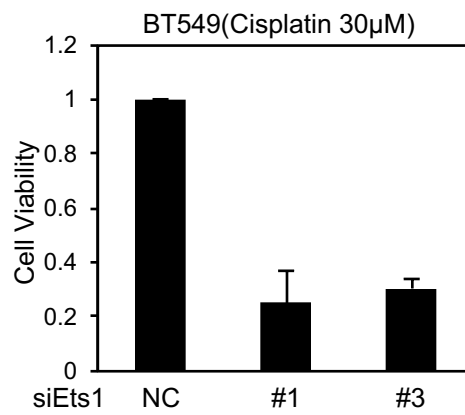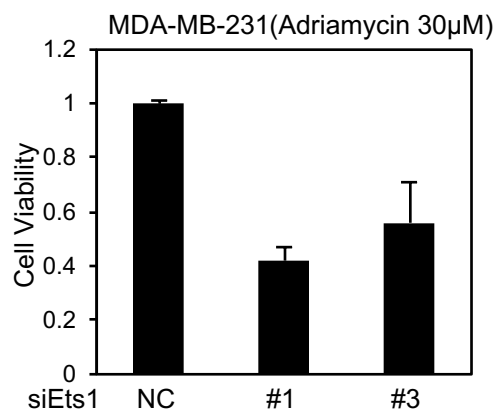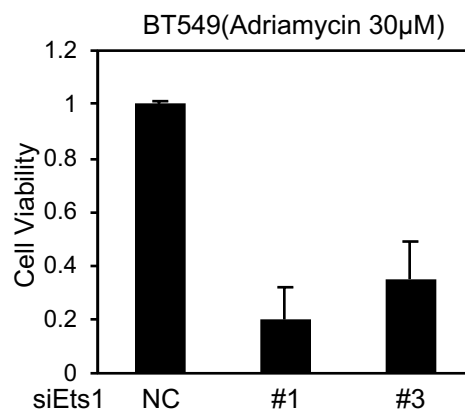

# Supplemental Figure 4

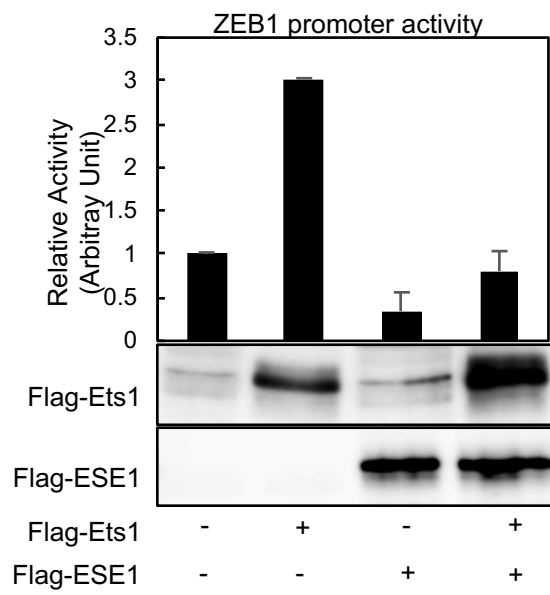

Supplement: CAS-108-952-s001.pdf [file CAS-108-952-s001.pdf]
